# Supplementary material for: Improvement of CRISPR/Cas9 system by transfecting Cas9-expressing Plasmodium berghei with linear donor template
Source: Springer Nature journal article supplement (doi:10.1038/s42003-020-01138-2), 2020-08-05
Supplement: 42003_2020_1138_MOESM2_ESM.pdf [file 42003_2020_1138_MOESM2_ESM.pdf]

## **Description of Additional Supplementary Files**

File Name: Supplementary Data 1

Description: Oligonucleotides used in this study

File Name: Supplementary Data 2

Description: SNPs and indels in pbcas9

File Name: Supplementary Data 3

Description: SNPs and indels in imc\_mut\_L

File Name: Supplementary Data 4

Description: Unique SNPs and indels in pbcas9 or imc\_mut\_L

File Name: Supplementary Data 5

Description: The definition of subtelomeric regions

File Name: Supplementary Data 6

Description: All source data underlying the graphs presented in the main figures.
